# Supplementary material for: In vitro and in vivo evaluation of a novel mitomycin nanomicelle delivery system
Source: Royal Society of Chemistry journal article supplement (doi:10.1039/c9ra02660f), 2019-01-01
Supplement: c9ra02660f1.pdf [file c9ra02660f1.pdf]

## Supplementary Information

### In vitro and in vivo evaluation of a novel mitomycin nanomicelle delivery system

Hongmei Yang<sup>a</sup>, Miao Wang<sup>a</sup>, Yihe Huang<sup>b,c</sup>, Qiaoyu Qiao<sup>a</sup>, Chunjie Zhao<sup>a</sup>, Min  
Zhao<sup>\*,a</sup>

<sup>a</sup>School of Pharmacy, Shenyang Pharmaceutical University, Shenyang 110016, China;

<sup>b</sup>College of Chemistry, Liaoning University, Shenyang 110036, China;

<sup>c</sup>Shenyang Medical College, Shenyang 110034, China

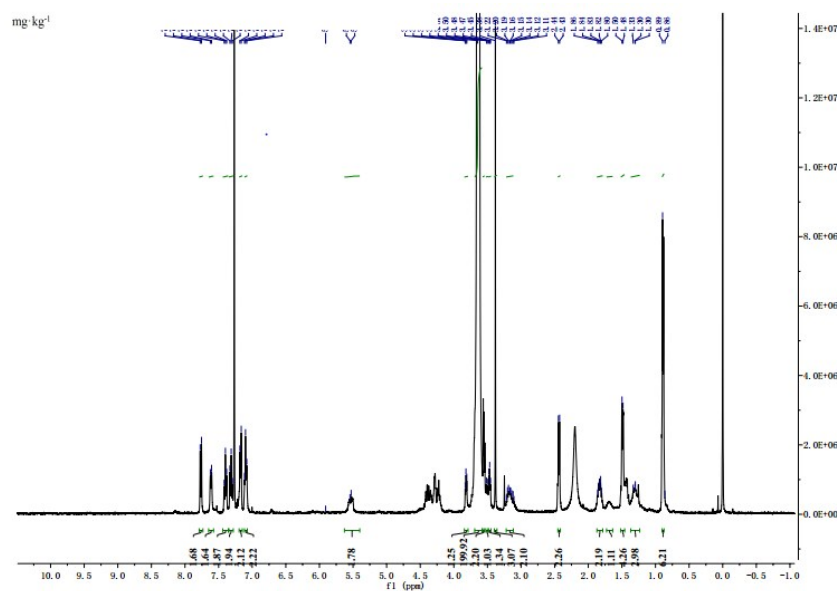

Fig. S1. <sup>1</sup>H NMR spectra of PEG-FIbu in CDCl<sub>3</sub>

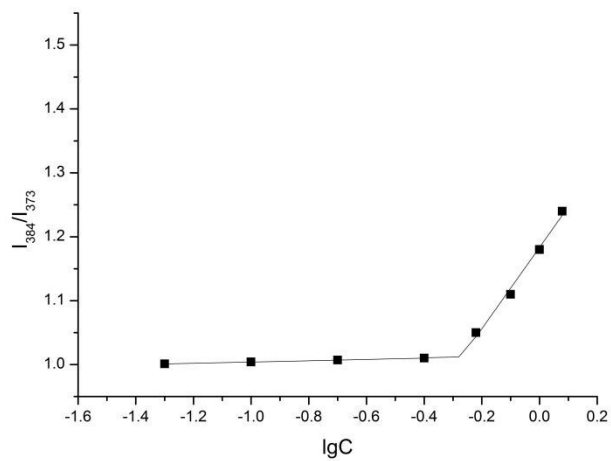

Fig. S2. Critical micelle concentration (CMC) of PEG-FIbu micelles

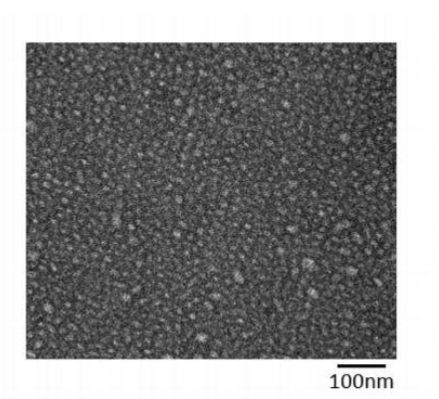

Fig. S3. TEM image of PEG-FIbu micelles

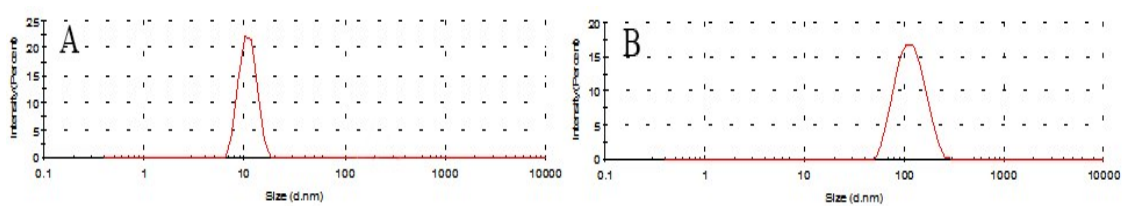

Fig. S4. Particle size distribution of PEG-FIbu (A) and MMC-loaded PEG-FIbu micelles (PEG-FIbu to MMC = 2.5:1, mol/mol) (B)

Table S1 Gradient elution program

---

| Time (min) | A% | B% |
|------------|----|----|
| 0          | 90 | 10 |
| 2          | 70 | 30 |
| 4          | 70 | 30 |
| 5          | 20 | 80 |
| 7          | 5  | 95 |
| 8          | 90 | 10 |

---
